# Supplementary material for: Synthesis of Halogenated 1,5-Diarylimidazoles and Their Inhibitory Effects on LPS-Induced PGE2 Production in RAW 264.7 Cells
Source: MDPI journal article supplement (doi:10.3390/molecules26206093), 2021-10-09
Supplement: s1 [file s1]

# Supplementary Data

## Synthesis

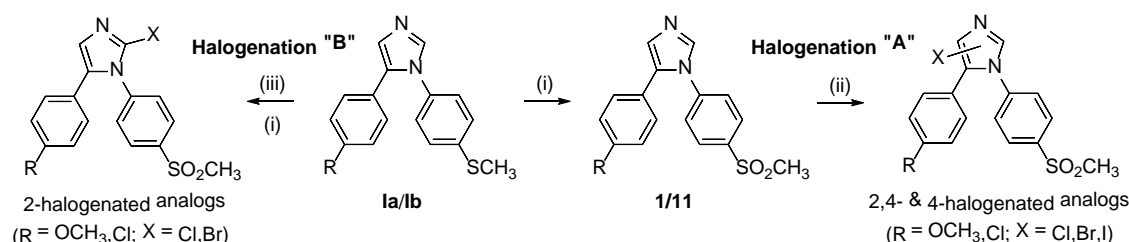

**Scheme 1.** Synthetic pathways and conditions of 5-aryl-1-(4-methylsulfonylphenyl)imidazoles with halogen(s) on the imidazole ring : (i) MCPBA, DCM (ii) NCS/NBS/NIS, CHCl<sub>3</sub> (iii) NCS/NBS, LiHMDS, THF

**General procedure for 5-aryl-1-(4-methylthiophenyl)imidazoles:** To the solution of imine (4 mmol) in MeOH and DME (20 mL,  $v/v=1/2$ ) was added anhydrous potassium carbonate (1.66 g, 12 mmol) and tosylmethyl isocyanide (0.94 g, 4.8 mmol). The reaction mixture was refluxed for 1 day. The solvent was removed, and the residue was extracted with DCM. The organic layer was washed with brine, dried over magnesium sulfate and concentrated. The residue was purified by silica gel column chromatography with hexane-EtOAc mixture as the eluent. **5-(4-methoxyphenyl)-1-(4-methylthiophenyl)imidazole (1a).** The product was obtained as a yellow solid with a yield of 10%; <sup>1</sup>H-NMR (300 MHz, CDCl<sub>3</sub>)  $\delta$  7.65 (s, 1H, 2-H), 7.24 (d, J = 8.6 Hz, 2H, Ar-H), 7.18 (s, 1H, 4-H), 7.08 (m, 4H, Ar-H), 6.81 (d, J = 8.8 Hz, 2H, Ar-H), 3.79 (s, 3H, OCH<sub>3</sub>), 2.50 (s, 3H, SCH<sub>3</sub>). **5-(4-chorophenyl)-1-(4-methylthiophenyl)imidazole (1b)** The product was obtained as a yellow solid with a yield of 49%; <sup>1</sup>H-NMR (300 MHz, CDCl<sub>3</sub>)  $\delta$  7.67 (d, J = 1.0 Hz, 1H, 2-H), 7.30-7.20 (m, 5H, Ar-H, 4-H), 7.07 (m, 4H, Ar-H), 2.51 (s, 3H, CH<sub>3</sub>).

**General procedure for 5-aryl-1-(4-methylsulfonylphenyl)imidazoles:** To the solution of intermediate **I** (1 mmol) in DCM (10 mL) was added, at 0°C, 3-chloroperbenzoic acid (0.56 g, 2.5 mmol). The mixture was stirred for 2 h, added more DCM, washed with aqueous Na<sub>2</sub>S<sub>2</sub>O<sub>3</sub>, NaHCO<sub>3</sub> and brine and dried over magnesium sulfate and concentrated. The residue was purified by silica gel column chromatography with hexane-EtOAc mixture as the eluent. **1-(4-methylsulfonylphenyl)-5-(4-methoxyphenyl)imidazole (1).** The product was obtained as a white solid with a yield of 84%; <sup>1</sup>H-NMR (300 MHz, CDCl<sub>3</sub>)  $\delta$  7.95 (d, J = 8.6 Hz, 2H, Ar-H), 7.74 (s, 1H, 2-H), 7.38 (d, J = 8.6 Hz, 2H, Ar-H), 7.22 (s, 1H, 4-H), 7.05 (d, J = 8.8 Hz, 2H, Ar-H), 6.84 (d, J = 8.8 Hz, 2H, Ar-H), 3.80 (s, 3H, OCH<sub>3</sub>), 3.08 (s, 3H, SO<sub>2</sub>CH<sub>3</sub>); ESIMS:  $m/z$  [M+H]<sup>+</sup> 329.1 ; **5-(4-chorophenyl)-1-(4-methylsulfonylphenyl)imidazole (11).** The product was obtained as a yellow solid with a yield of 87%; <sup>1</sup>H-NMR (300 MHz, CDCl<sub>3</sub>)  $\delta$  8.02 (d, J = 8.6 Hz, 2H, Ar-H), 7.78 (s, 1H, 2-H), 7.30 (m, 5H, Ar-H, 4-H), 7.05 (d, J = 8.5 Hz, 2H, Ar-H), 3.11 (s, 3H, CH<sub>3</sub>).

**General procedure for halogenation of 5-aryl-1-(4-methylsulfonylphenyl)imidazoles:** To the solution of compound **1/11** (0.5 mmol) in CHCl<sub>3</sub> (4 mL) was added NCS/NBS/NIS (0.75 mmol). The mixture was refluxed for 5 h, extracted with DCM, washed with aqueous NaHSO<sub>3</sub> and brine and dried over magnesium sulfate and concentrated. The residue was purified by silica gel column chromatography to give 4-halo and 2,4-dihalo imidazoles. Different from chlorination, 2-bromo imidazole products were separated in some bromination reactions. While iodination with NIS in CH<sub>3</sub>CN always afforded 2-, 4- and 2,4-iodo imidazole products.

**2,4-dichloro-5-(4-methoxyphenyl)-1-(4-methylsulfonylphenyl)imidazole (2).** The product was obtained as a white solid with a yield of 15%; <sup>1</sup>H-NMR (300 MHz, CDCl<sub>3</sub>)  $\delta$  8.00 (d, J = 8.7 Hz, 2H, Ar-H), 7.37 (d, J = 8.7 Hz, 2H, Ar-H), 7.03 (d, J = 8.9 Hz, 2H, Ar-H), 6.80 (d, J = 8.9 Hz, 2H, Ar-H), 3.79 (s, 3H, OCH<sub>3</sub>), 3.11 (s, 3H, SO<sub>2</sub>CH<sub>3</sub>). **4-chloro-1-(4-methylsulfonylphenyl)-5-(4-methoxyphenyl)imidazole (3).** The product was obtained as a white solid with a yield of 41%; <sup>1</sup>H-NMR (300 MHz, CDCl<sub>3</sub>)  $\delta$  7.95 (d, J = 8.6 Hz, 2H, Ar-H), 7.65 (s, 1H, 2-H), 7.32 (d, J = 8.6 Hz, 2H, Ar-H), 7.11 (d, J = 8.8 Hz, 2H, Ar-H), 6.88 (d, J = 8.8 Hz, 2H, Ar-H), 3.82 (s, 3H, OCH<sub>3</sub>), 3.09 (s, 3H, SO<sub>2</sub>CH<sub>3</sub>); <sup>13</sup>C-NMR (150 MHz, CDCl<sub>3</sub>)  $\delta$  159.9, 140.6, 135.0, 129.1, 129.0, 127.1, 125.7, 118.7, 114.4, 55.3, 44.4; HRMS (EI)  $m/z$  Calcd for C<sub>17</sub>H<sub>15</sub>ClN<sub>2</sub>O<sub>3</sub>S [M]<sup>+</sup> 362.0492 Found 362.0493.

**2,4-dibromo-5-(4-methoxyphenyl)-1-(4-methylsulfonylphenyl)imidazole (5).** The product was obtained as a white solid with a yield of 15%; <sup>1</sup>H-NMR (300 MHz, CDCl<sub>3</sub>)  $\delta$  7.98 (d, J = 8.6 Hz, 2H, Ar-H), 7.36 (d, J = 8.7 Hz, 2H, Ar-H), 7.04 (d, J

= 8.9 Hz, 2H, Ar-H), 6.80 (d, J = 8.9 Hz, 2H, Ar-H), 3.79 (s, 3H, OCH<sub>3</sub>), 3.11 (s, 3H, SO<sub>2</sub>CH<sub>3</sub>). **4-bromo-5-(4-methoxyphenyl)-1-(4-methylsulfonylphenyl)imidazole (6)** The product was obtained as a white solid with a yield of 68%; <sup>1</sup>H-NMR (300 MHz, CDCl<sub>3</sub>) δ 7.95 (d, J = 8.7 Hz, 2H, Ar-H), 7.70 (s, 1H, 2-H), 7.31 (d, J = 8.7 Hz, 2H, Ar-H), 7.15 (d, J = 8.8 Hz, 2H, Ar-H), 6.85 (d, J = 8.8 Hz, 2H, Ar-H), 3.82 (s, 3H, OCH<sub>3</sub>), 3.08 (s, 3H, SO<sub>2</sub>CH<sub>3</sub>).

**2,4-diiodo-5-(4-methoxyphenyl)-1-(4-methylsulfonylphenyl)imidazole (8)**. The product was obtained as a yellow solid with a yield of 5%; <sup>1</sup>H-NMR (300 MHz, CDCl<sub>3</sub>) δ 7.91 (d, J = 8.7 Hz, 2H, Ar-H), 7.25 (d, J = 8.7 Hz, 2H, Ar-H), 6.95 (d, J = 8.9 Hz, 2H, Ar-H), 6.72 (d, J = 8.9 Hz, 2H, Ar-H), 3.71 (s, 3H, OCH<sub>3</sub>), 3.04 (s, 3H, SO<sub>2</sub>CH<sub>3</sub>). **4-iodo-5-(4-methoxyphenyl)-1-(4-methylsulfonylphenyl)imidazole (9)**. The product was obtained as a yellow solid with a yield of 23%; <sup>1</sup>H-NMR (300 MHz, CDCl<sub>3</sub>) δ 7.94 (d, J = 8.7 Hz, 2H, Ar-H), 7.76 (s, 1H, 2-H), 7.28 (d, J = 8.7 Hz, 2H, Ar-H), 7.12 (d, J = 8.9 Hz, 2H, Ar-H), 6.88 (d, J = 8.9 Hz, 2H, Ar-H), 3.83 (s, 3H, OCH<sub>3</sub>), 3.08 (s, 3H, SO<sub>2</sub>CH<sub>3</sub>); ESIMS: *m/z* [M+H]<sup>+</sup> 455.0; **2-iodo-5-(4-methoxyphenyl)-1-(4-methylsulfonylphenyl)imidazole (10)**. The product was obtained as a yellow solid with a yield of 6%; <sup>1</sup>H-NMR (300 MHz, CDCl<sub>3</sub>) δ 7.95 (d, J = 8.7 Hz, 2H, Ar-H), 7.35 (d, J = 8.7 Hz, 2H, Ar-H), 7.18 (s, 1H, 4-H), 6.86 (d, J = 8.9 Hz, 2H, Ar-H), 6.69 (d, J = 8.9 Hz, 2H, Ar-H), 3.70 (s, 3H, OCH<sub>3</sub>), 3.06 (s, 3H, SO<sub>2</sub>CH<sub>3</sub>); ESIMS: *m/z* [M+H]<sup>+</sup> 455.0.

**2,4-dichloro-5-(4-chorophenyl)-1-(4-methylsulfonylphenyl)imidazole (12)**. The product was obtained as a yellow solid with a yield of 24%; <sup>1</sup>H-NMR (300 MHz, CDCl<sub>3</sub>) δ 8.02 (d, J = 8.7 Hz, 2H, Ar-H), 7.40 (d, J = 8.7 Hz, 2H, Ar-H), 7.28 (d, J = 8.7 Hz, 2H, Ar-H), 7.06 (d, J = 8.7 Hz, 2H, Ar-H), 3.12 (s, 3H, CH<sub>3</sub>). **4-chloro-5-(4-chorophenyl)-1-(4-methylsulfonylphenyl)imidazole (13)**. The product was obtained as a yellow solid with a yield of 20%; <sup>1</sup>H-NMR (300 MHz, CDCl<sub>3</sub>) δ 8.00 (d, J = 8.6 Hz, 2H, Ar-H), 7.67 (s, 1H, 2-H), 7.32 (m, 4H, Ar-H), 7.13 (d, J = 8.5 Hz, 2H, Ar-H), 3.10 (s, 3H, CH<sub>3</sub>); <sup>13</sup>C-NMR (150 MHz, CDCl<sub>3</sub>) δ 140.8, 140.1, 135.9, 135.2, 131.0, 129.3, 129.2, 125.8, 124.9, 55.1, 49.2, 44.4; HRMS (EI) *m/z* Calcd for C<sub>16</sub>H<sub>12</sub>Cl<sub>2</sub>N<sub>2</sub>O<sub>2</sub>S [M]<sup>+</sup> 365.9997 Found 365.9994.

**2,4-dibromo-5-(4-chorophenyl)-1-(4-methylsulfonylphenyl)imidazole (15)**. The product was obtained as a yellow solid with a yield of 15%; <sup>1</sup>H-NMR (300 MHz, CDCl<sub>3</sub>) δ 8.01 (d, J = 8.7 Hz, 2H, Ar-H), 7.37 (d, J = 8.7 Hz, 2H, Ar-H), 7.27 (d, J = 8.7 Hz, 2H, Ar-H), 7.07 (d, J = 8.7 Hz, 2H, Ar-H), 3.12 (s, 3H, CH<sub>3</sub>). **4-bromo-5-(4-chorophenyl)-1-(4-methylsulfonylphenyl)imidazole (16)**. The product was obtained as a yellow solid with a yield of 50%; <sup>1</sup>H-NMR (300 MHz, CDCl<sub>3</sub>) δ 7.98 (d, J = 8.7 Hz, 2H, Ar-H), 7.72 (s, 1H, 2-H), 7.33 (m, 4H, Ar-H), 7.16 (d, J = 8.6 Hz, 2H, Ar-H), 3.10 (s, 3H, CH<sub>3</sub>); <sup>13</sup>C-NMR (150 MHz, CDCl<sub>3</sub>) δ 140.5, 140.3, 137.1, 135.0, 131.2, 129.2, 129.2, 128.6, 125.8, 125.7, 117.6, 44.4; HRMS (EI) *m/z* Calcd for C<sub>16</sub>H<sub>12</sub>BrClN<sub>2</sub>O<sub>2</sub>S [M]<sup>+</sup> 409.9491 Found 409.9490. **2-bromo-5-(4-chorophenyl)-1-(4-methylsulfonylphenyl)imidazole (17)**. The product was obtained as a white solid with a yield of 11%; <sup>1</sup>H-NMR (300 MHz, CDCl<sub>3</sub>) δ 8.05 (d, J = 8.7 Hz, 2H, Ar-H), 7.43 (d, J = 8.7 Hz, 2H, Ar-H), 7.26 (s, 1H, 4-H), 7.24 (d, J = 8.7 Hz, 2H, Ar-H), 6.96 (d, J = 8.7 Hz, 2H, Ar-H), 3.14 (s, 3H, CH<sub>3</sub>).

**5-(4-chorophenyl)-2,4-diiodo-1-(4-methylsulfonylphenyl)imidazole (18)**. The product was obtained as a yellow solid with a yield of 14%; <sup>1</sup>H-NMR (300 MHz, CDCl<sub>3</sub>) δ 7.94 (d, J = 8.4 Hz, 2H, Ar-H), 7.28 (d, J = 8.4 Hz, 2H, Ar-H), 7.20 (d, J = 8.4 Hz, 2H, Ar-H), 6.98 (d, J = 8.4 Hz, 2H, Ar-H), 3.05 (s, 3H, CH<sub>3</sub>). **5-(4-chorophenyl)-4-iodo-1-(4-methylsulfonylphenyl)imidazole (19)**. The product was obtained as a yellow solid with a yield of 42%; <sup>1</sup>H-NMR (300 MHz, CDCl<sub>3</sub>) δ 7.89 (d, J = 8.4 Hz, 2H, Ar-H), 7.71 (s, 1H, 2-H), 7.26 (d, J = 8.4 Hz, 2H, Ar-H), 7.22 (d, J = 8.4 Hz, 2H, Ar-H), 7.08 (d, J = 8.4 Hz, 2H, Ar-H), 3.10 (s, 3H, CH<sub>3</sub>). **5-(4-chorophenyl)-2-iodo-1-(4-methylsulfonylphenyl)imidazole (20)**. The product was obtained as a white solid with a yield of 24%; <sup>1</sup>H-NMR (300 MHz, CDCl<sub>3</sub>) δ 8.05 (d, J = 8.5 Hz, 2H, Ar-H), 7.43 (d, J = 8.5 Hz, 2H, Ar-H), 7.32 (s, 1H, 4-H), 7.22 (d, J = 8.5 Hz, 2H, Ar-H), 6.95 (d, J = 8.5 Hz, 2H, Ar-H), 3.15 (s, 3H, CH<sub>3</sub>); ESIMS: *m/z* [M+H]<sup>+</sup> 458.9.

**Alternative procedure for synthesis of 2-chloro- and 2-bromo-5-aryl-1-(4-methylsulfonylphenyl)imidazoles:** To the solution of 5-aryl-1-(4-methylthiophenyl)imidazoles (**1a** and **1b**, 0.4 mmol) in THF (3 mL) was added LiHMDS (1 M in THF, 1.2 mL) dropwise at -20°C. The mixture was stirred for 0.5 h, then solution of NCS or NBS (1.6 mmol) in THF (3 mL) was added. The reaction mixture was stirred for 0.5 h at -20°C and 6 h at room temperature. Saturated aqueous NH<sub>4</sub>Cl was added to the mixture, extracted with ethyl acetate. The organic layer was washed with aqueous NaHSO<sub>3</sub> and brine, dried over magnesium sulfate, and concentrated under vacuum. Following oxidation of crude 2-chloro- and 2-bromo-5-aryl-1-(4-methylthiophenyl)imidazole with *m*CPBA followed by silica gel column chromatography yielded pure 2-chloro- and 2-bromo-5-aryl-1-(4-methylsulfonylphenyl)imidazoles.

**2-chloro-5-(4-methoxyphenyl)-1-(4-methylsulfonylphenyl)imidazole (4)**. The product was obtained as a white solid with a yield of 14%; <sup>1</sup>H-NMR (300 MHz, CDCl<sub>3</sub>) δ 8.01 (d, J = 8.5 Hz, 2H, Ar-H), 7.41 (d, J = 8.5 Hz, 2H, Ar-H), 7.10 (s, 1H, 4-H), 6.95 (d, J = 8.8 Hz, 2H, Ar-H), 6.78 (d, J = 8.8 Hz, 2H, Ar-H), 3.78 (s, 3H, OCH<sub>3</sub>), 3.12 (s, 3H, SO<sub>2</sub>CH<sub>3</sub>). **2-bromo-5-(4-methoxyphenyl)-1-(4-methylsulfonylphenyl)imidazole (7)**. The product was obtained as a white solid with a yield of 12%; <sup>1</sup>H-NMR (300 MHz, CDCl<sub>3</sub>) δ 7.96 (d, J = 8.7 Hz, 2H, Ar-H), 7.64 (s, 1H, 4-H), 7.32 (d, J = 8.7 Hz, 2H, Ar-H), 7.12 (d, J = 8.8 Hz, 2H, Ar-H), 6.88 (d, J = 8.8 Hz, 2H, Ar-H), 3.82 (s, 3H, OCH<sub>3</sub>), 3.09 (s, 3H, SO<sub>2</sub>CH<sub>3</sub>); <sup>13</sup>C-NMR (150 MHz, CDCl<sub>3</sub>) δ 159.9, 140.7, 140.1, 136.4, 131.3, 129.6, 129.0, 125.7, 119.3, 116.9, 114.3, 55.3, 44.4; HRMS (EI) *m/z* Calcd for C<sub>17</sub>H<sub>15</sub>BrN<sub>2</sub>O<sub>3</sub>S [M]<sup>+</sup> 405.9987 Found 405.9988.

**2-chloro-5-(4-chlorophenyl)-1-(4-methylsulfonylphenyl)imidazole (14).** The product was obtained as a white solid with a yield of 12%; <sup>1</sup>H-NMR (300 MHz, CDCl<sub>3</sub>) δ 8.05 (d, J = 8.7 Hz, 2H, Ar-H), 7.42 (d, J = 8.7 Hz, 2H, Ar-H), 7.22 (d, J = 8.6 Hz, 2H, Ar-H), 7.19 (s, 1H, 4-H), 6.96 (d, J = 8.6 Hz, 2H, Ar-H), 3.13 (s, 3H, CH<sub>3</sub>).

## Biology

### MTT assay

Effects of 9 – 20 and Celecoxib on cell viability in Raw 264.7 cells

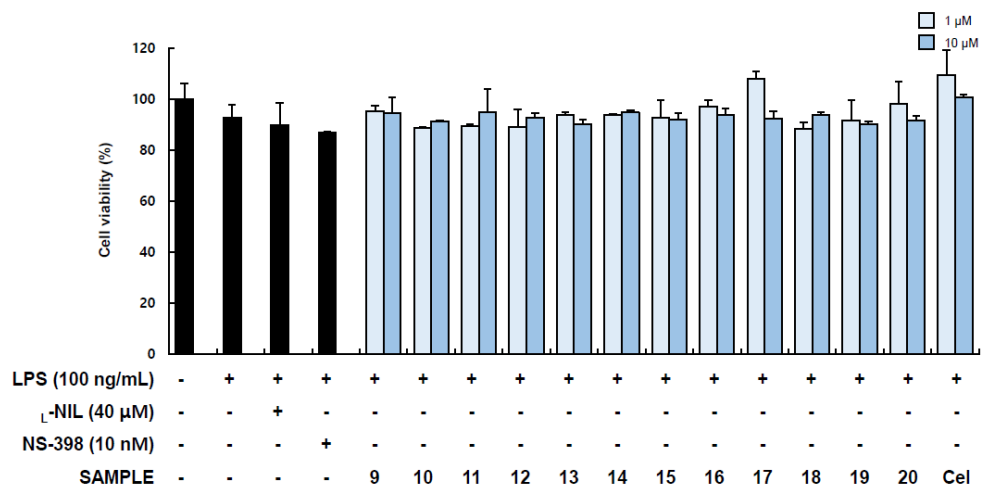

Effects of 9 – 20 and Celecoxib on cell viability in Raw 264.7 cells

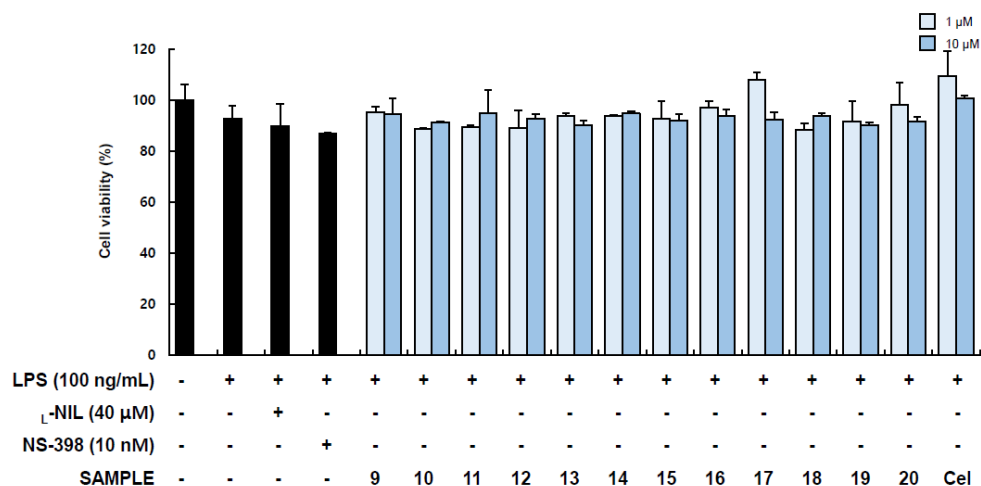

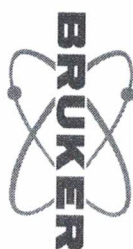

Current Data Parameters  
NAME 210708  
EXPNO 12  
PROCNO 1

#### F2 - Acquisition Parameters

Date\_ 20210708  
Time 12.19 h  
INSTRUM Avance  
PROBHD Z114607\_0836 ( 4  
PULPROG zgpg30  
ID 65536  
SOLVENT CDCl3  
NS 1024  
DS 4  
SWH 41666.668 Hz  
FIDRES 1.271566 Hz  
AQ 0.7864320 sec  
RG 101  
DW 12.000 use  
DE 6.50 use  
TE 298.0 K  
D1 2.00000000 sec  
D11 0.03000000 sec  
TD0 1  
SF01 150.9445556 MHz  
NUC1 13C  
P0 3.90 use  
P1 11.70 use  
PLW1 80.00000000 W  
SFO2 600.2324009 MHz  
NUC2 1H  
CPDPRG12 waltz65  
PCPD2 70.00 use  
PLW2 33.82600021 W  
PLW12 0.69032001 W  
PLW13 0.34722299 W

#### F2 - Processing parameters

SI 32768  
SF 150.9279535 MHz  
WDW EM  
SSB 0  
GB 0

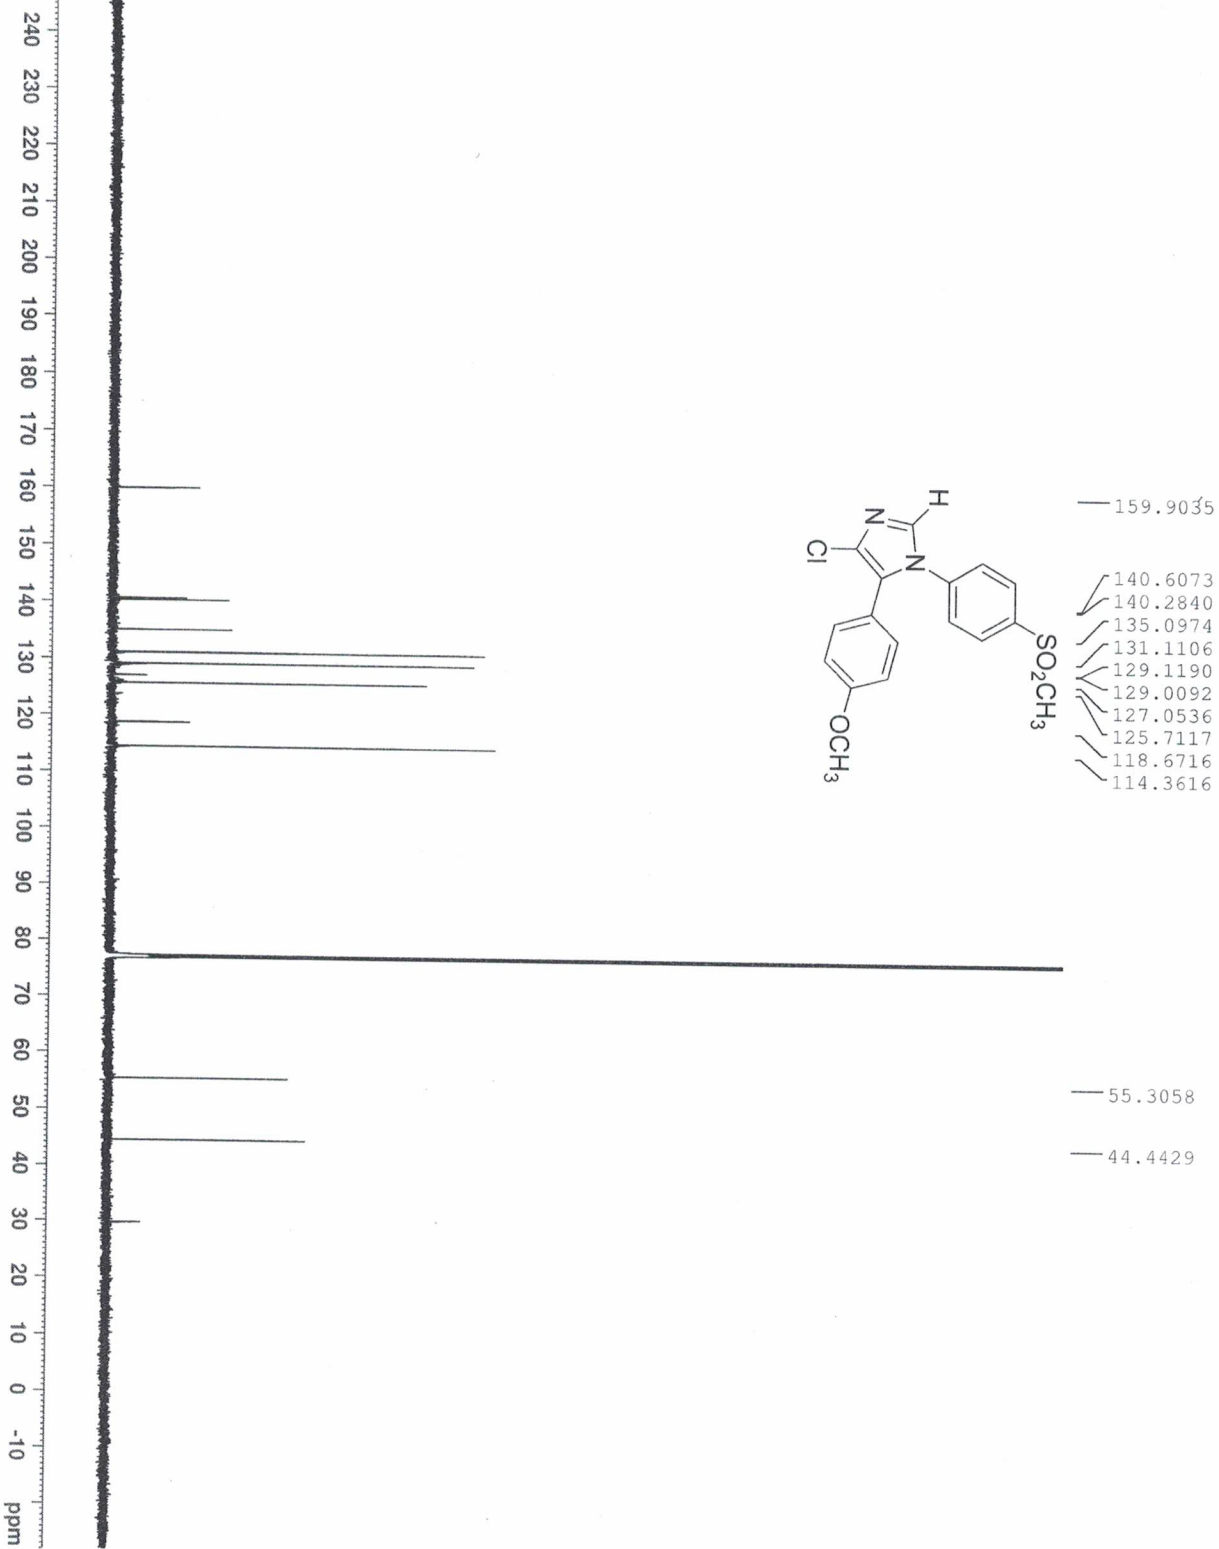

240 230 220 210 200 190 180 170 160 150 140 130 120 110 100 90 80 70 60 50 40 30 20 10 0 -10 ppm

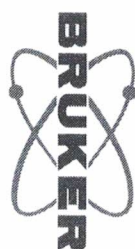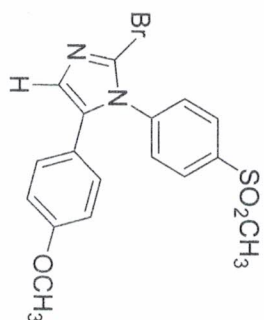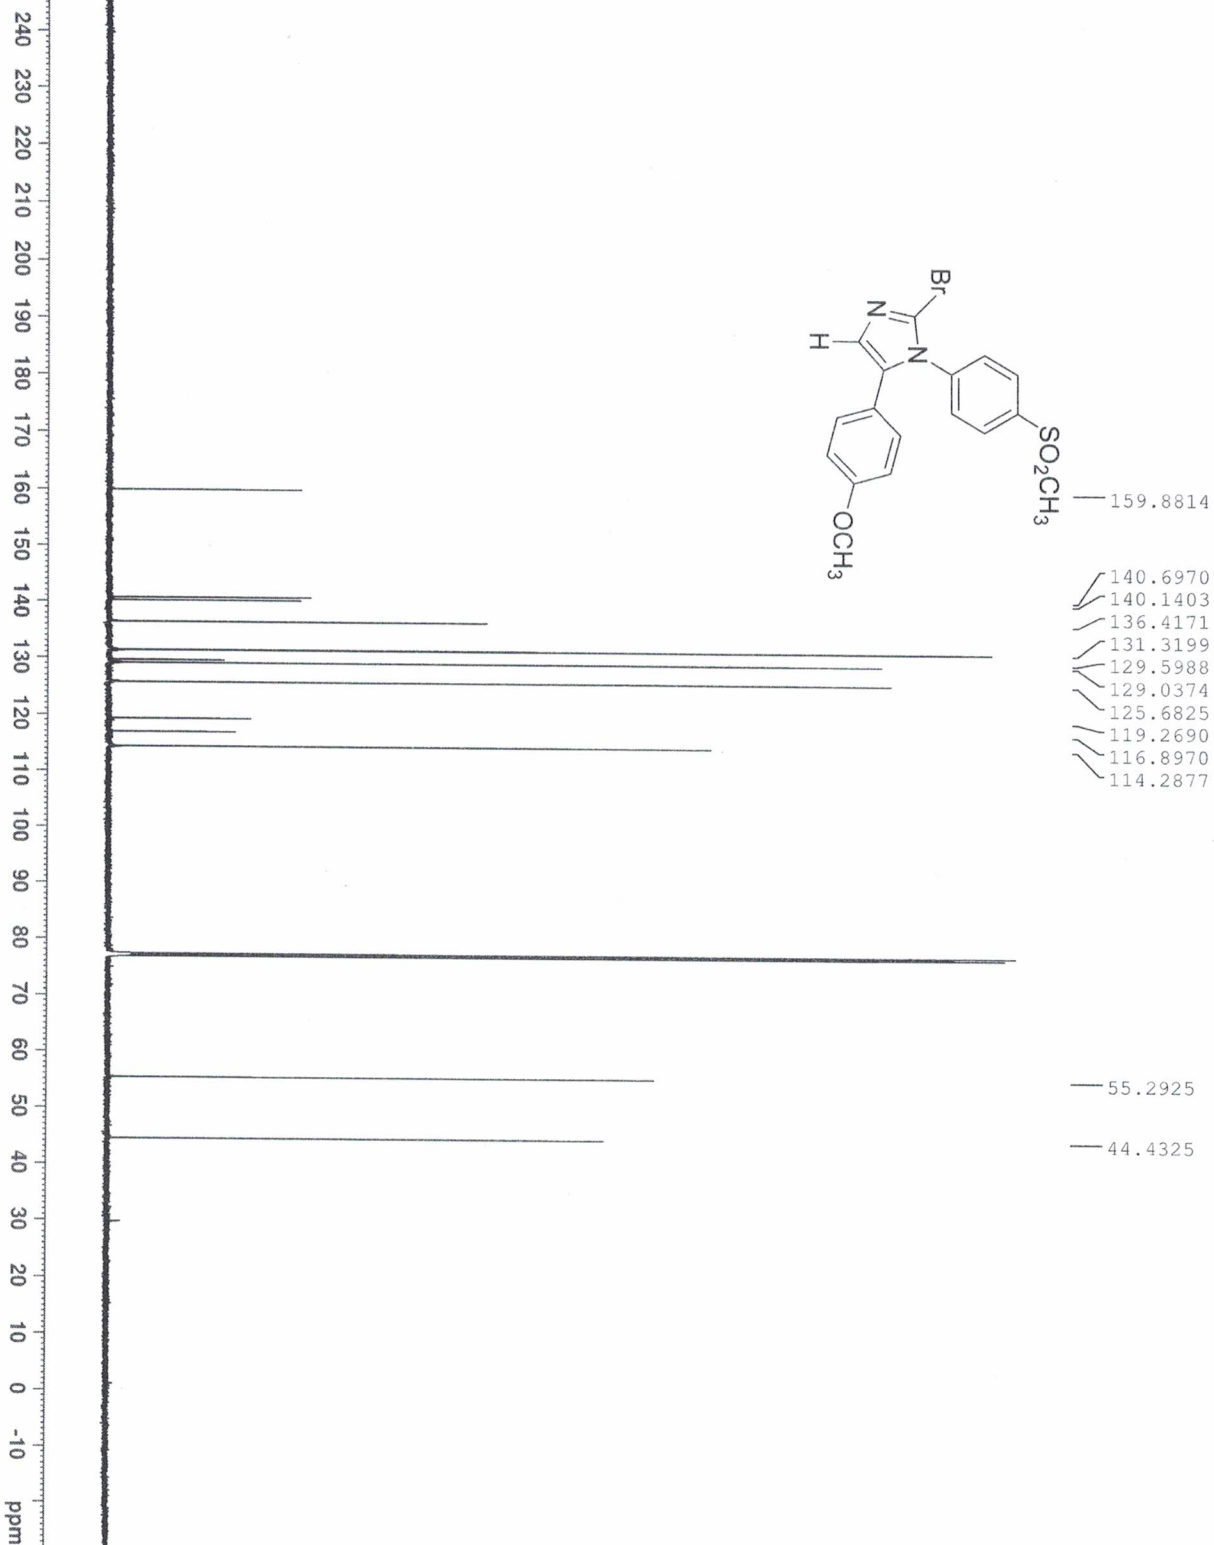

Current Data Parameters  
NAME 210708  
EXPNO 21  
PROCNO 1

F2 - Acquisition Parameters

Date\_ 20210708

Time 11.25 h

INSTRUM Avance

PROBHD Z114607\_0856 (

PULPROG zgpg30

TD 65536

CDCL3

NS 1024

DS 4

SWH 41666.668 Hz

FIDRES 1.271566 Hz

AQ 0.7864320 sec

RG 101

DW 12.000 use

DE 6.50 use

TE 298.0 K

D1 2.0000000 sec

D11 0.03000000 sec

TD0 1

SFO1 150.9445356 MHz

NUC1 13C

P0 3.90 use

P1 11.70 use

PLM1 80.00000000 W

SE02 600.2324009 MHz

NUC2 1H

CPDPRG12 waltz65

PCPD2 70.00 use

PLW2 33.8260021 W

PLW12 0.69032001 W

PLW13 0.34722999 W

F2 - Processing Parameters

SI 32768

SF 150.9279535 MHz

WDW EM

SSB 0

GB 0

PC 0

SC 0

SD 0

SE 0

SI 0

SM 0

SN 0

SO 0

SP 0

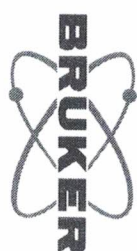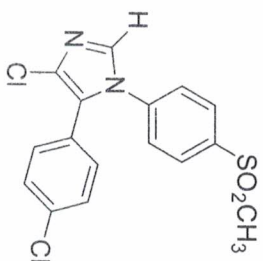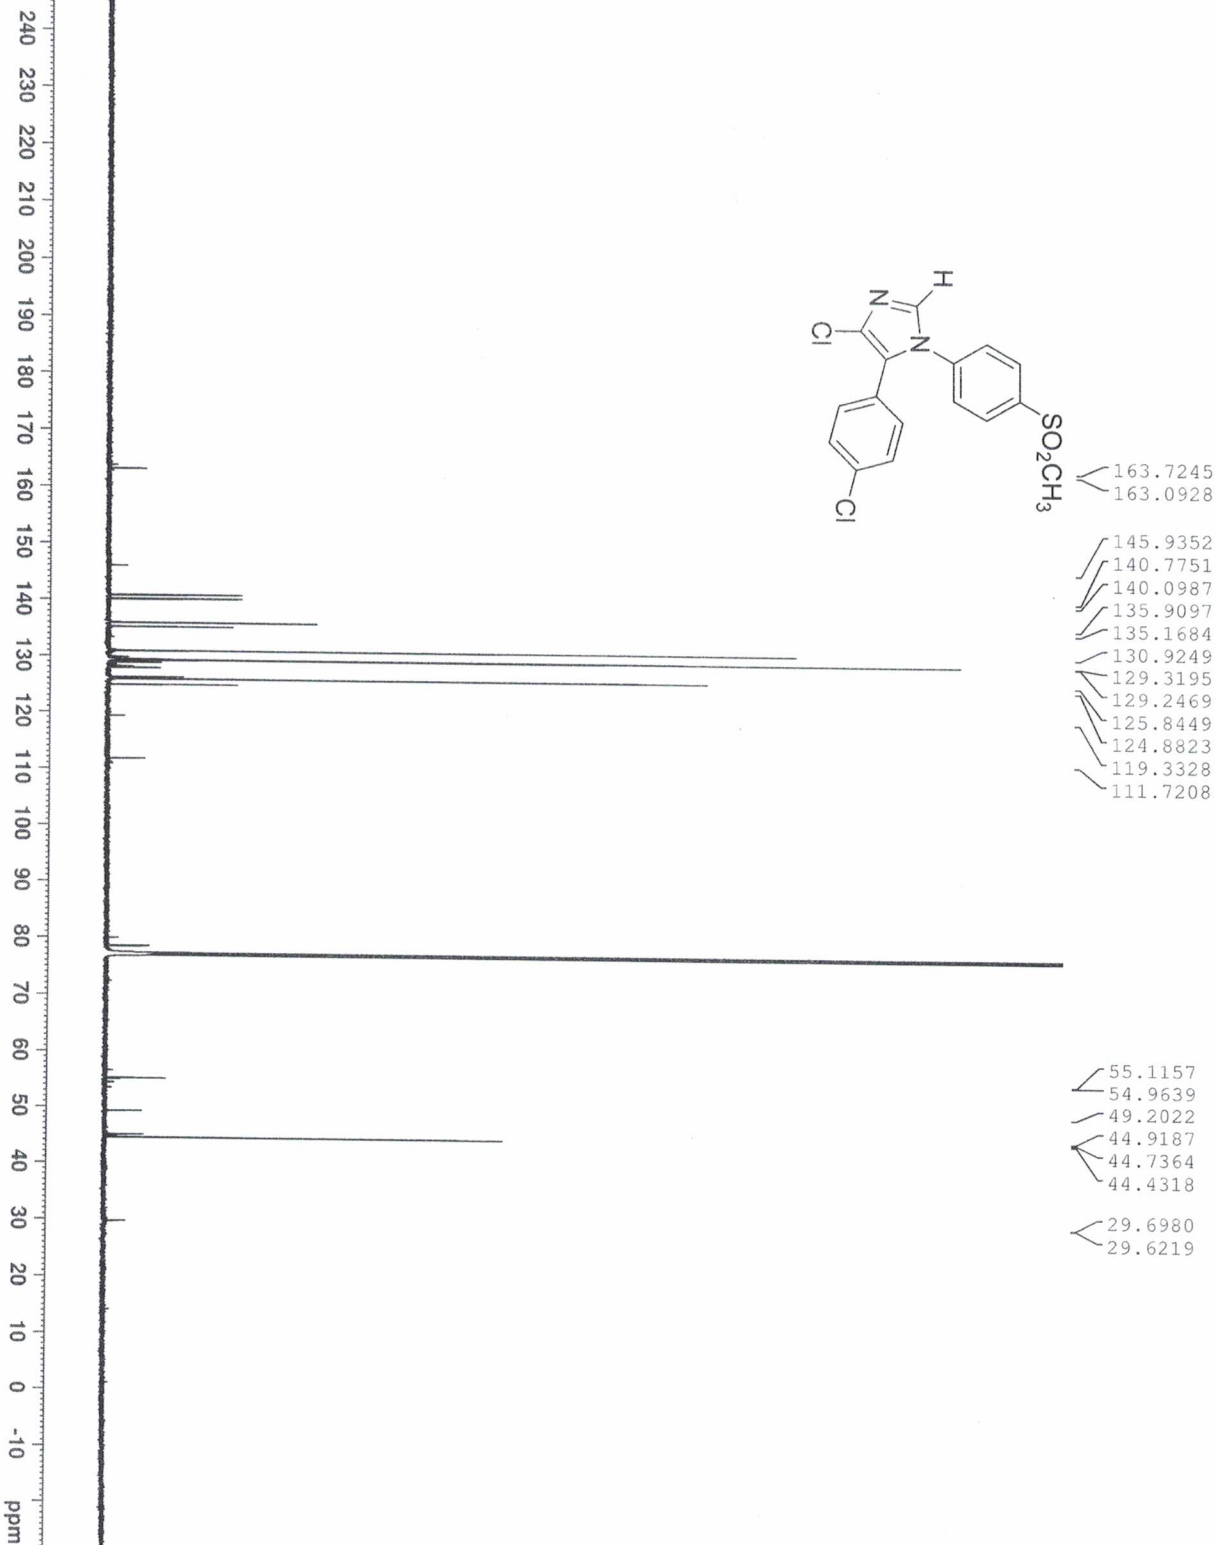

Current Data Parameters  
 NAME 210706  
 EXPNO 31  
 PROCNO 1

F2 - Acquisition Parameters  
 Date\_ 20210707  
 Time 5.33 h  
 INSTRUM Avance  
 PROBHD 2114607\_0856 (PULPROG zgpg30  
 TD 65536  
 FIDRES 1.271566 Hz  
 AQ 0.7864320 sec  
 RG 101  
 DW 12.000 use  
 DE 6.50 use  
 TE 298.0 K  
 D1 2.00000000 sec  
 D11 0.03000000 sec  
 TDO 1  
 SFO1 150.9445556 MHz  
 NUC1 13C  
 P0 3.90 use  
 P1 11.70 use  
 PLW1 80.00000000 W  
 SFO2 600.2324009 MHz  
 NUC2 1H  
 CPDPRG12 waltz65  
 PCPD2 70.00 use  
 PLW2 33.82600021 W  
 PLW12 0.69032001 W  
 PLW13 0.34722999 W

F2 - Processing Parameters  
 SI 32768  
 SF 150.9279535 MHz  
 WDW EM  
 SSB 0  
 GB 0.00

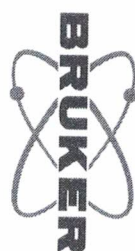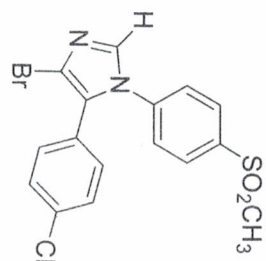

140.5453  
140.3018  
137.1496  
135.0360  
131.1511  
129.2343  
129.1546  
128.6165  
125.7571  
125.6587  
117.5775

44.4240

240 230 220 210 200 190 180 170 160 150 140 130 120 110 100 90 80 70 60 50 40 30 20 10 0 -10 ppm

Current Data Parameters  
NAME 210706  
EXPNO 41  
PROCNO 1

F2 - Acquisition Parameters  
Date\_ 20210707  
Time 9.56 h  
INSTRUM Avance  
PROBHD 2114607.0856 (zgpg30)  
PULPROG zgpg30  
TD 65536  
SOLVENT CDCl3  
NS 5120  
DS 4  
SWH 41666.668 Hz  
FIDRES 1.271566 Hz  
AQ 0.7864320 sec  
RG 101  
DE 12.000 use  
TE 298.0 K  
D1 2.00000000 sec  
D11 0.03000000 sec  
TD0 1  
SF01 150.9445556 MHz  
NUC1 13C  
P0 3.90 use  
P1 11.70 use  
PLM1 80.00000000 W  
SFO2 600.2324009 MHz  
NUC2 1H  
CEPRG12 waltz65  
PCPD2 70.00 use  
PLM2 33.82600021 W  
PLM12 0.69032001 W  
PLM13 0.34722999 W

F2 - Processing parameters  
SI 32768  
SF 150.9279535 MHz  
WDW EM  
SSB 0  
GB 0

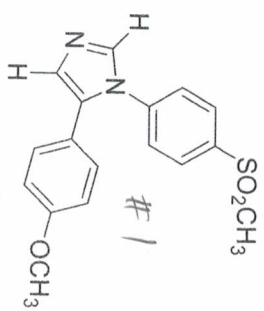

$C_{17}H_{16}N_2O_3S$   
Molecular Weight: 328.39

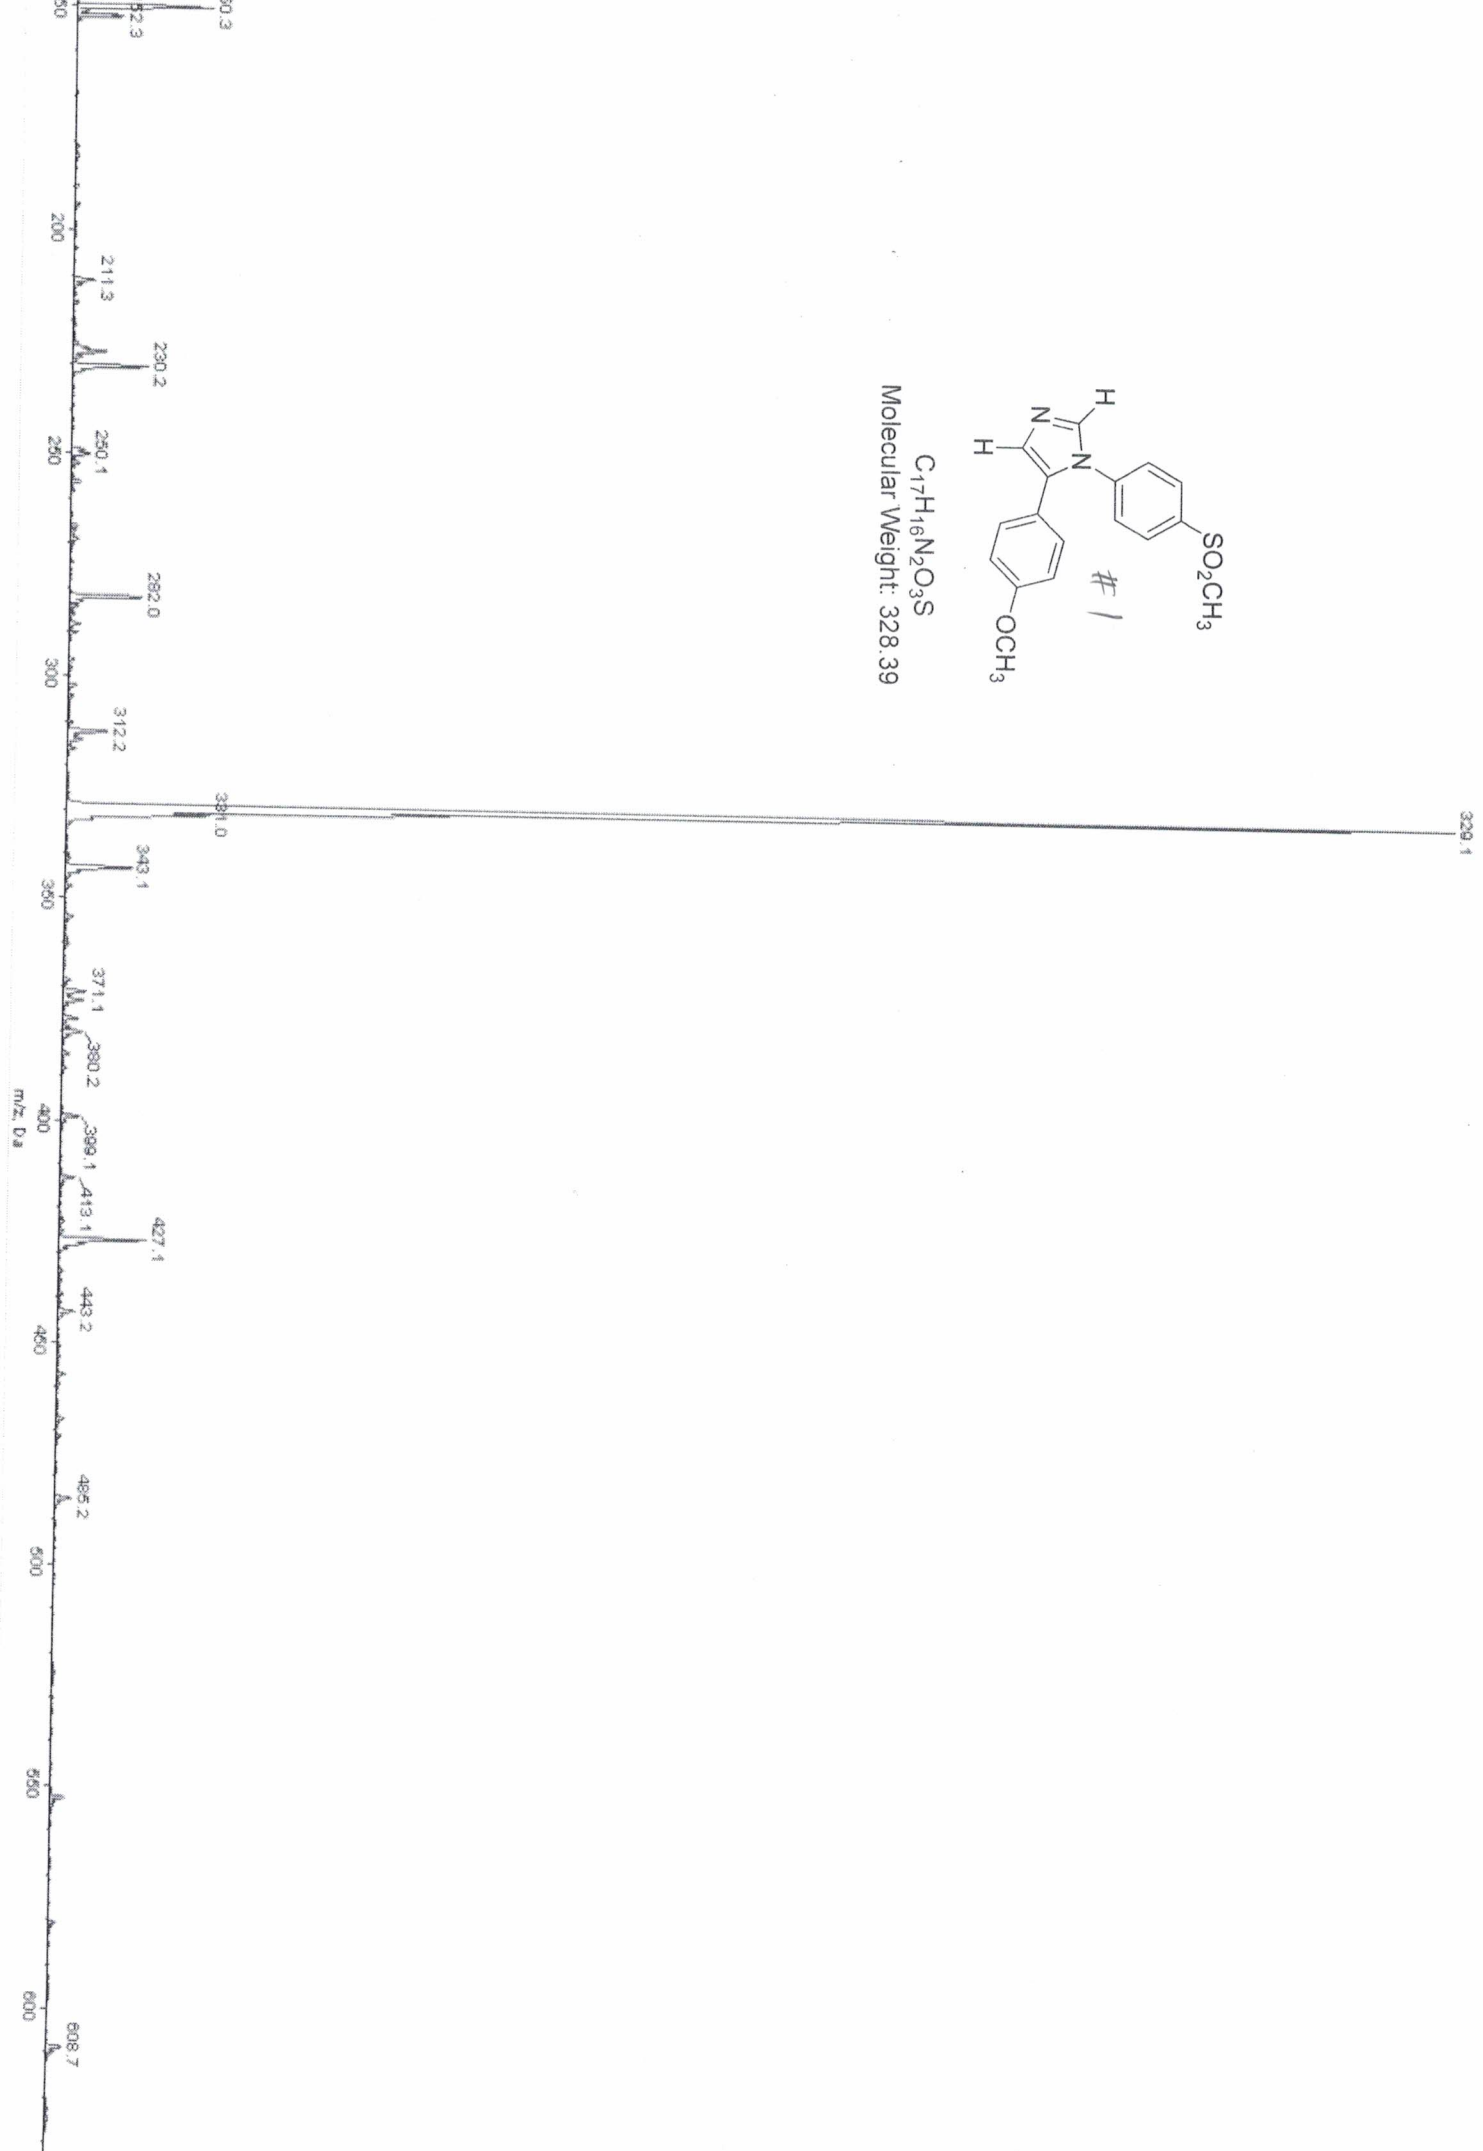



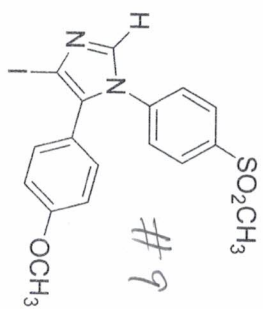

$C_{17}H_{15}N_2O_3S$

Molecular Weight: 454.28

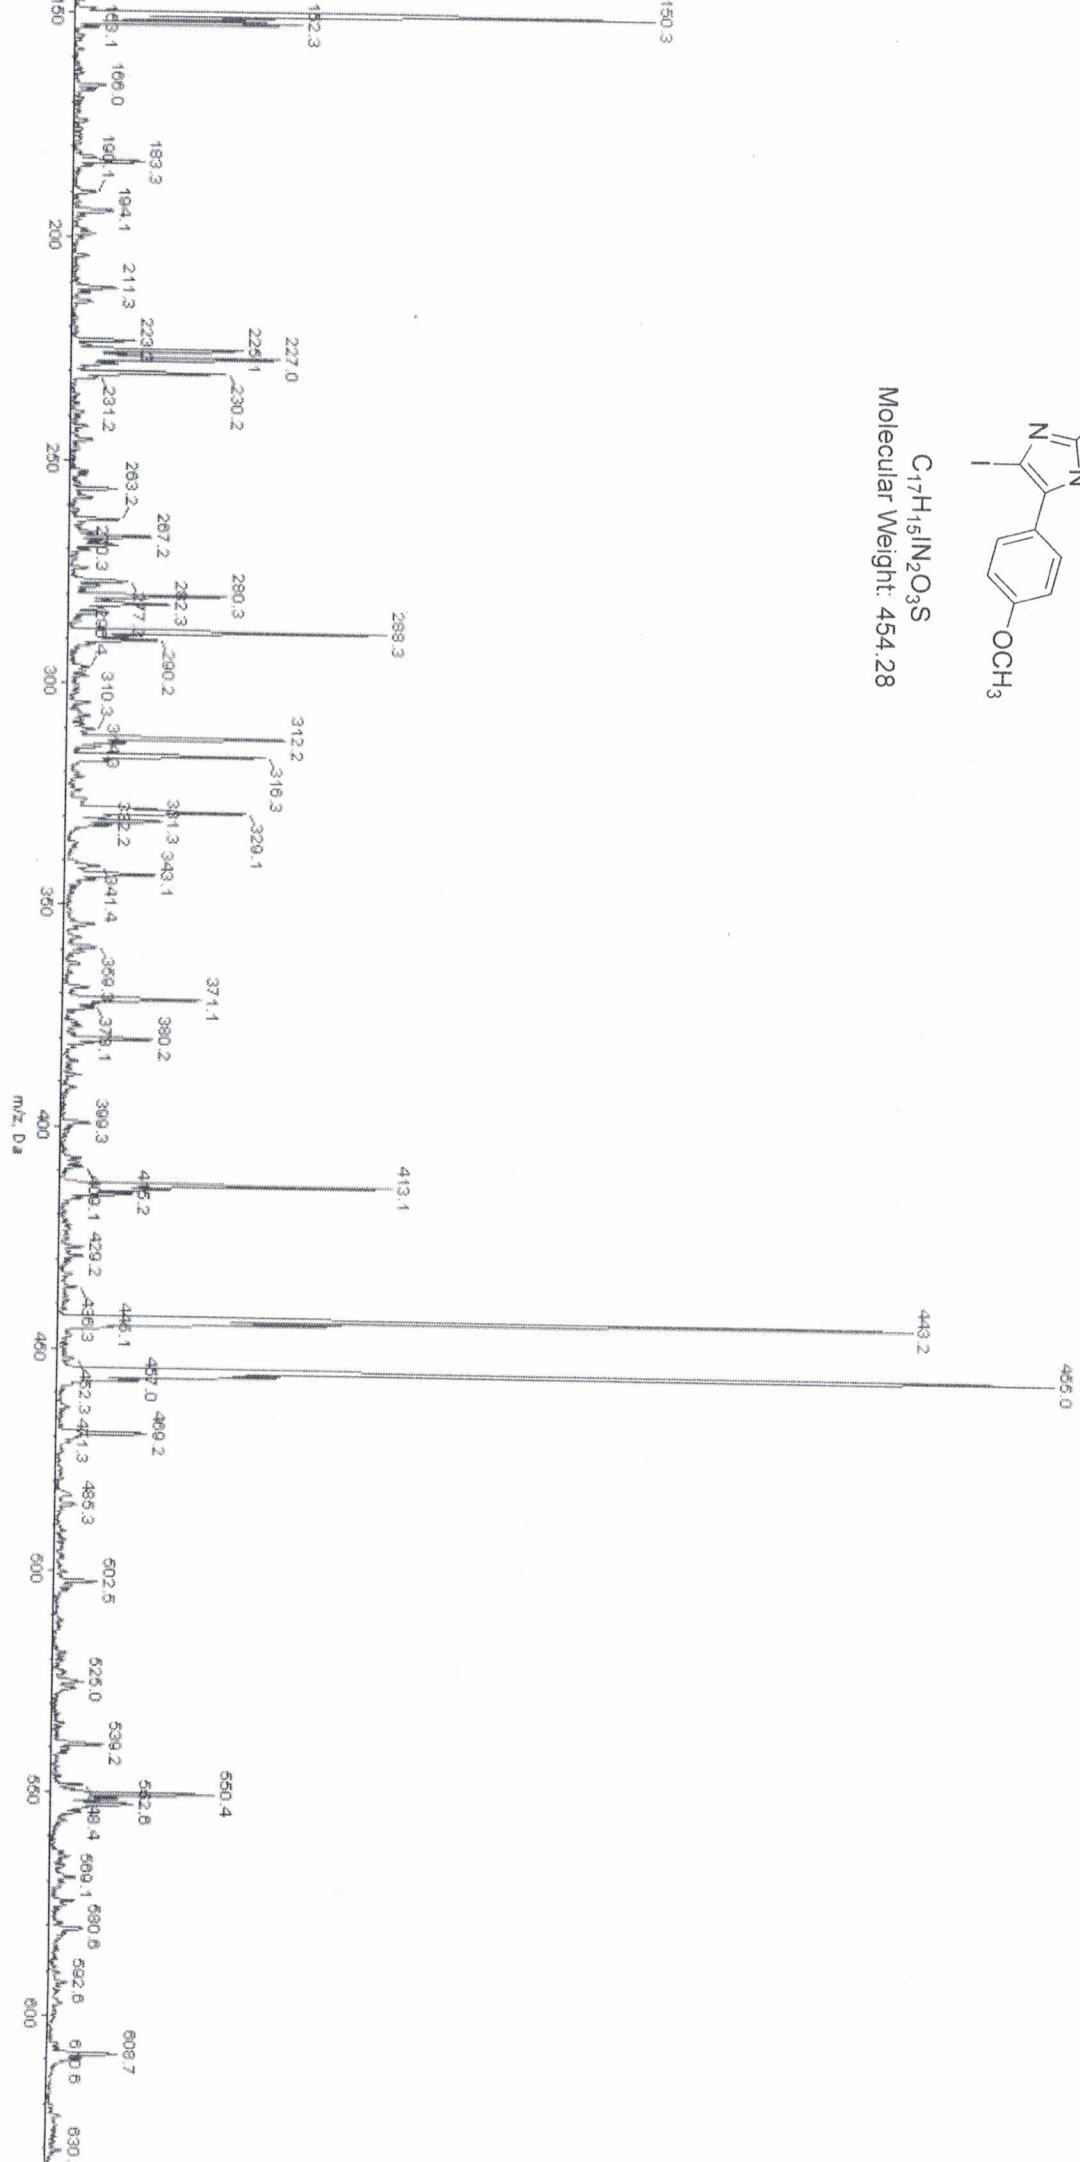

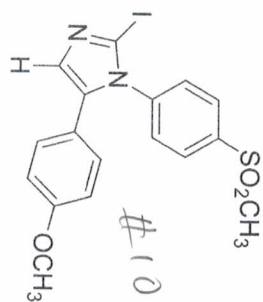

$\text{C}_{17}\text{H}_{15}\text{N}_2\text{O}_3\text{S}$

Molecular Weight: 454.28

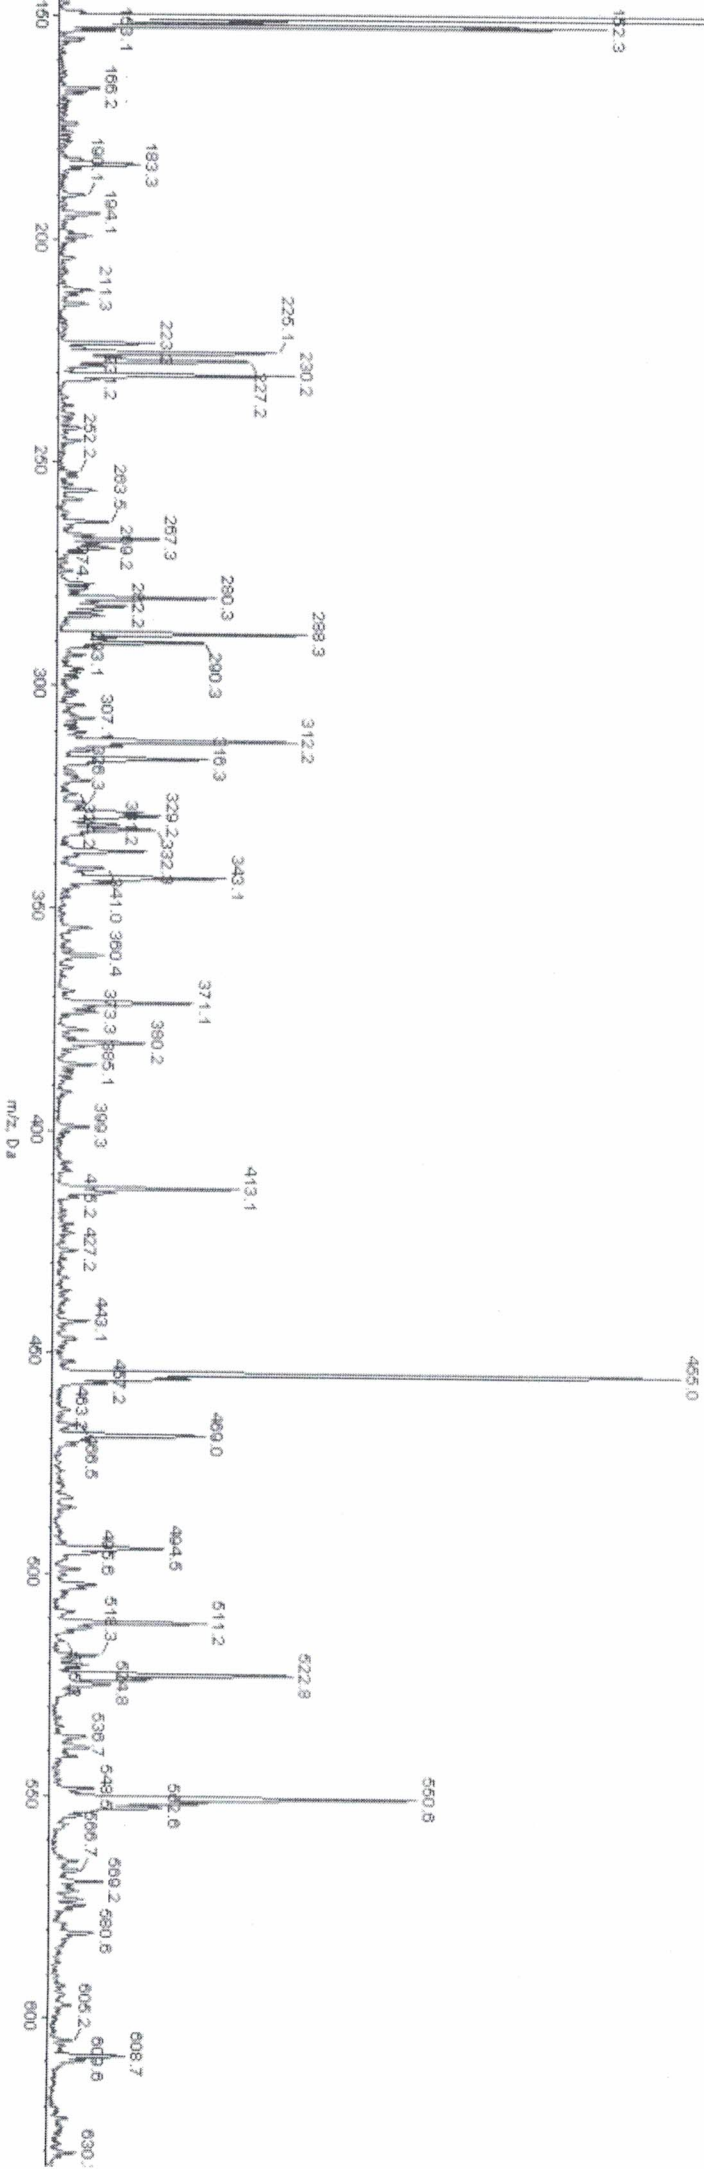

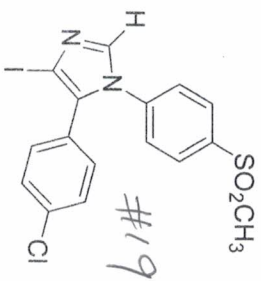

Chemical Formula:  
 $\text{C}_{16}\text{H}_{12}\text{ClIN}_2\text{O}_2\text{S}$   
 Molecular Weight: 458.70

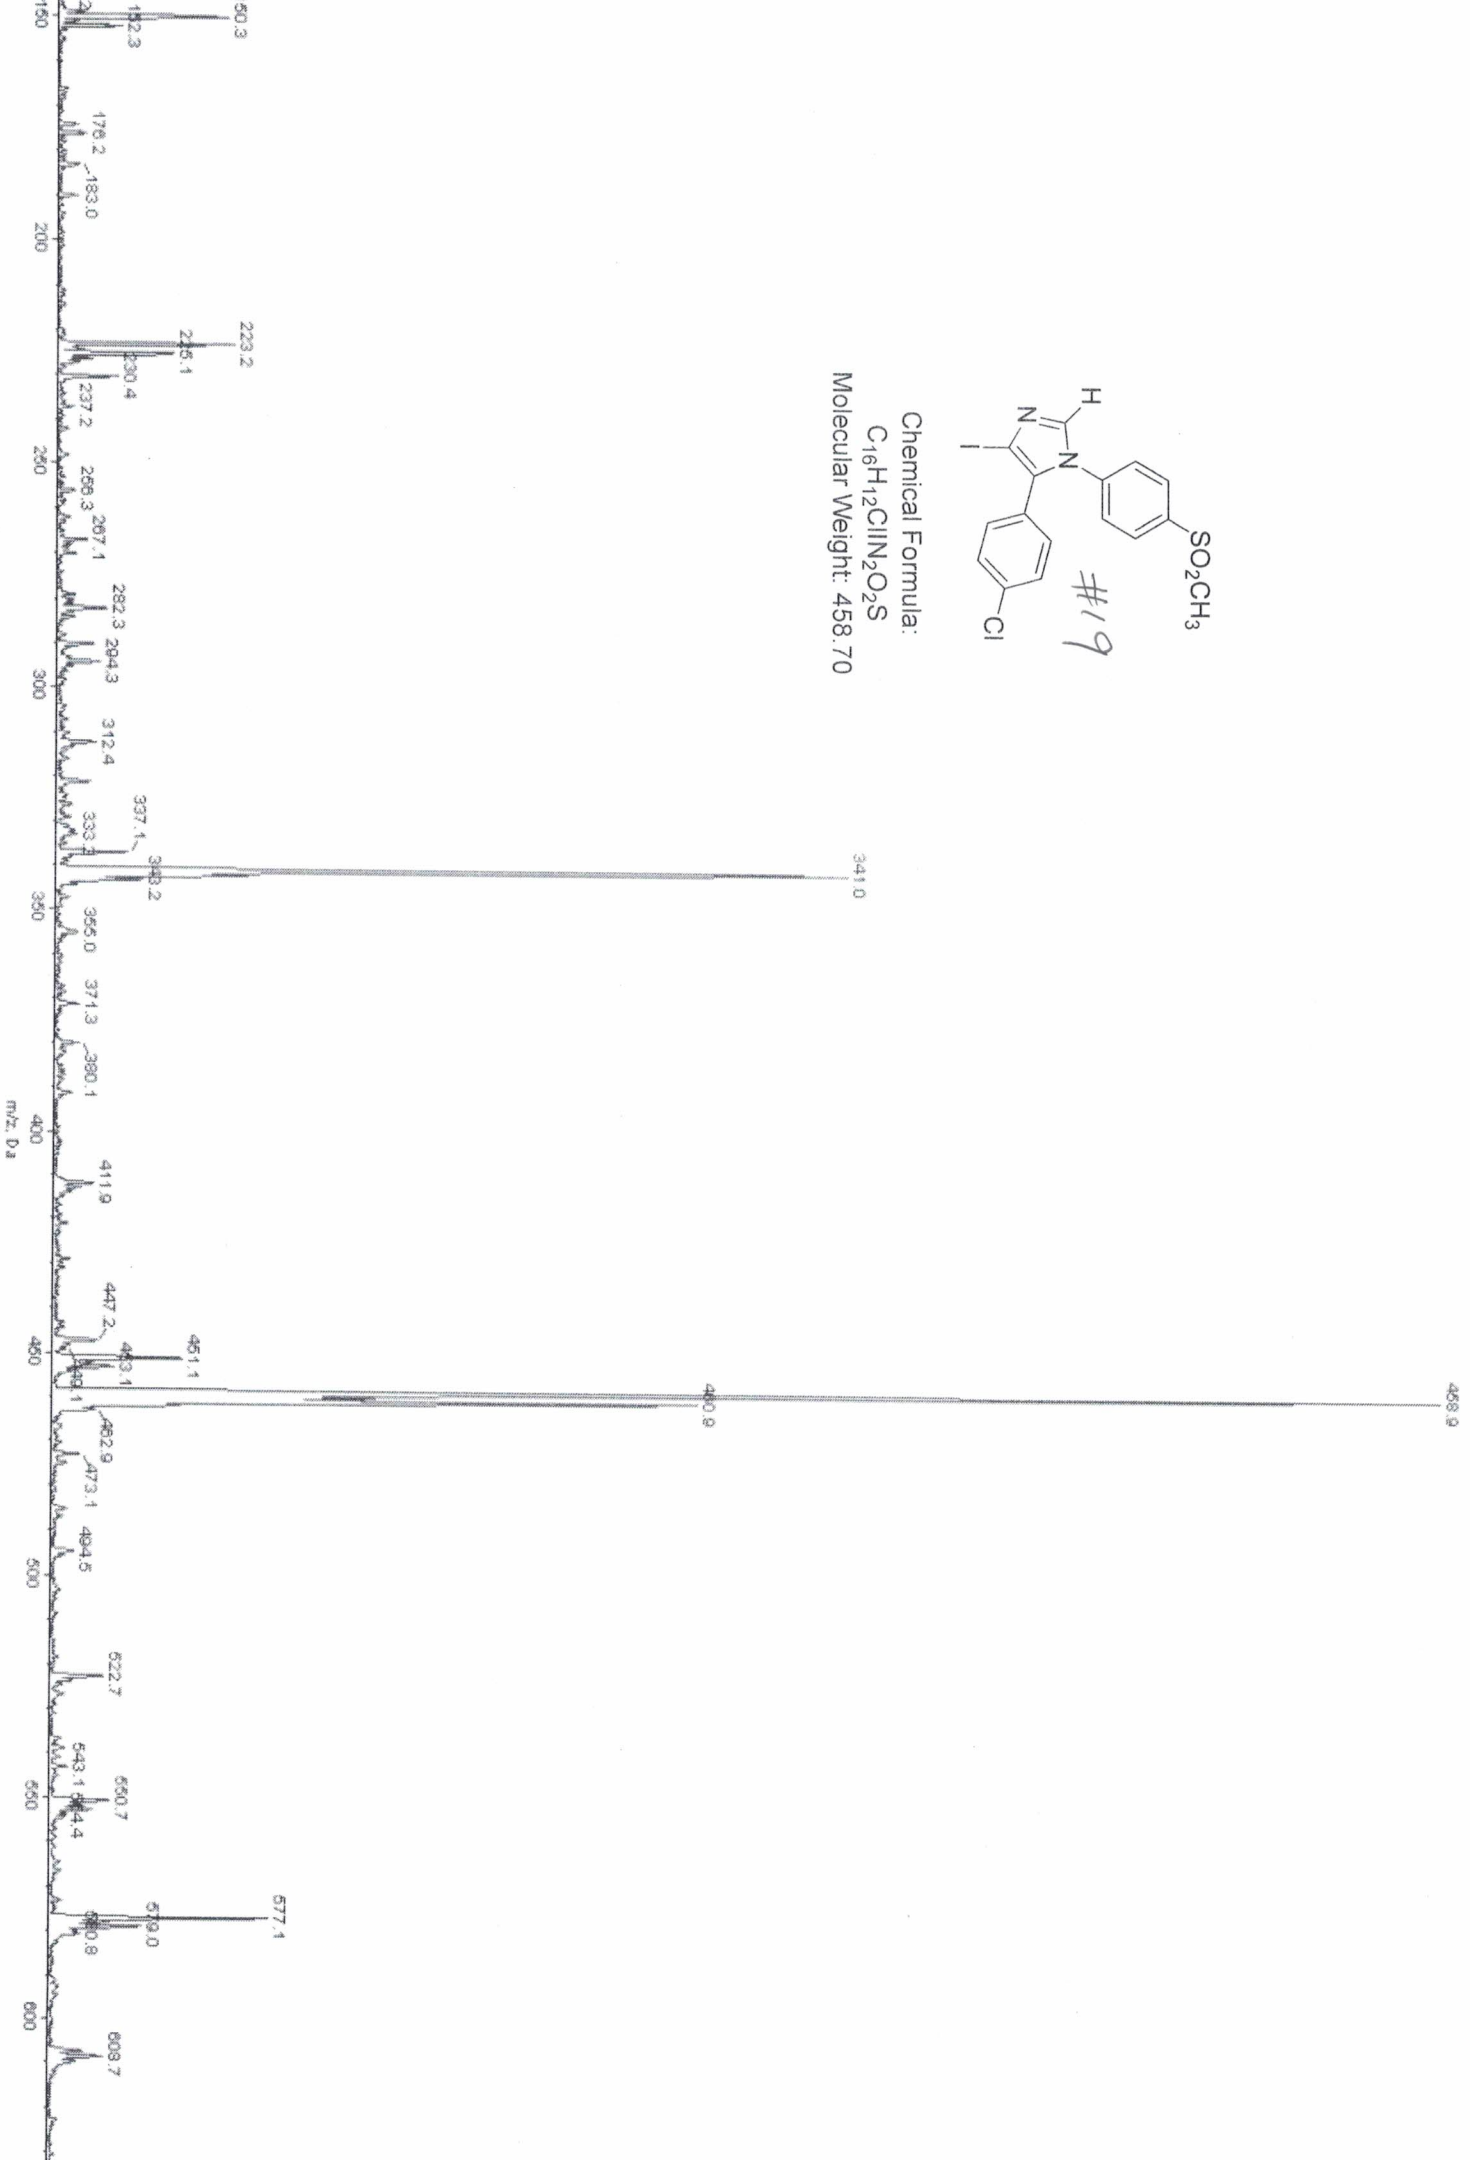

## HRMS data for 3, 7, 13, 16 (active compounds)

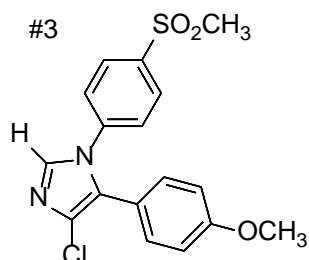

Chemical Formula:  $C_{17}H_{15}ClN_2O_3S$   
Exact Mass: 362.0492

Data : #3\_re HR\_2      Date : 07-Jul-2021 16:15  
Instrument : MStation  
Sample : -  
Note : -  
Inlet : Reservoir      Ion Mode : EI+  
RT : 0.77 min      Scan# : 21  
Elements : C 17/0, H 35/0, 35Cl 1/0, 37Cl 1/0, N 2/0, O 3/0, S 1/0  
Mass Tolerance : 1mmu  
Unsaturation (U.S.) : -0.5 - 20.0

|   | Observed m/z | Int%   | Err [ppm / mmu] | U.S. Composition          |
|---|--------------|--------|-----------------|---------------------------|
| 1 | 362.0493     | 100.00 | +0.3 / +0.1     | 12.0 C17 H15 35Cl N2 O3 S |

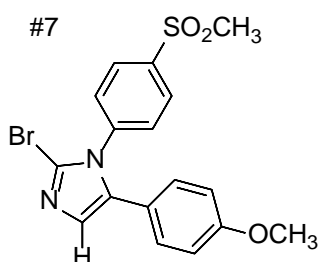

Chemical Formula:  $C_{17}H_{15}BrN_2O_3S$   
Exact Mass: 405.9987

Data : #7\_re HR\_3      Date : 07-Jul-2021 16:34  
Instrument : MStation  
Sample : -  
Note : -  
Inlet : Direct      Ion Mode : EI+  
RT : 0.35 min      Scan# : 10  
Elements : C 17/0, H 35/0, 79Br 1/0, 81Br 1/0, N 2/0, O 3/0, S 1/0  
Mass Tolerance : 1mmu  
Unsaturation (U.S.) : -0.5 - 20.0

|   | Observed m/z | Int%   | Err [ppm / mmu] | U.S. Composition          |
|---|--------------|--------|-----------------|---------------------------|
| 1 | 405.9988     | 100.00 | +0.3 / +0.1     | 12.0 C17 H15 79Br N2 O3 S |

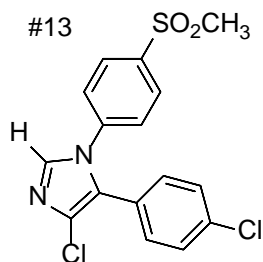

Chemical Formula:  $C_{16}H_{12}Cl_2N_2O_2S$   
Exact Mass: 365.9997

Data : #13\_HR 3      Date : 07-Jul-2021 11:43  
Instrument : MStation  
Sample : -  
Note : -  
Inlet : Reservoir      Ion Mode : EI+  
RT : 0.73 min      Scan# : 20  
Elements : C 16/0, H 33/0, 35Cl 2/0, 37Cl 2/0, N 2/0, O 2/0, S 1/0  
Mass Tolerance : 1mmu  
Unsaturation (U.S.) : -0.5 - 20.0

|   | Observed m/z | Int%   | Err [ppm / mmu] | U.S. Composition           |
|---|--------------|--------|-----------------|----------------------------|
| 1 | 365.9994     | 100.00 | -0.7 / -0.3     | 12.0 C16 H12 35Cl2 N2 O2 S |

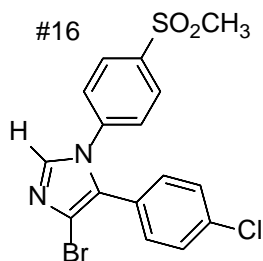

Chemical Formula:  $C_{16}H_{12}BrClN_2O_2S$   
Exact Mass: 409.9491

Data : #16\_HR 5      Date : 07-Jul-2021 11:01  
Instrument : MStation  
Sample : -  
Note : -  
Inlet : Reservoir      Ion Mode : EI+  
RT : 0.88 min      Scan# : 24  
Elements : C 16/0, H 12/0, 79Br 1/0, 81Br 1/0, 35Cl 1/0, 37Cl 1/0, N 2/0, O 2/0, S 1/0  
Mass Tolerance : 10mmu  
Unsaturation (U.S.) : -0.5 - 100.0  
Unsaturation (U.S.) : -0.5 - 100.0

|   | Observed m/z | Int%   | Err [ppm / mmu] | U.S. Composition               |
|---|--------------|--------|-----------------|--------------------------------|
| 1 | 409.9490     | 100.00 | -0.3 / -0.1     | 12.0 C16 H12 79Br 35Cl N2 O2 S |
